# Supplementary material for: In situ synthesis of a graphene/titanium nitride hybrid material with highly improved performance for lithium storage
Source: Royal Society of Chemistry journal article supplement (doi:10.1039/c2jm16128a), 2012-01-01
Supplement: c2jm16128a.pdf [file c2jm16128a.pdf]

## Supporting Information

### **In situ synthesis of graphene/titanium nitride hybrid material with highly improved performance for lithium storage**

Yanhua Yue<sup>a‡</sup>, Pengxian Han<sup>a‡</sup>, Xiang He<sup>b</sup>, Kejun Zhang<sup>a</sup>, Zhihong Liu<sup>a</sup>, Chuanjian Zhang<sup>a</sup>, Shanmu Dong<sup>a</sup>, Lin Gu<sup>\*b</sup> and Guanglei Cui<sup>\*a</sup>

<sup>a</sup> *Qingdao Institute of Bioenergy and Bioprocess Technology, Chinese Academy of Sciences, Qingdao 266101, P. R. China. E-mail: [cuiql@qibebt.ac.cn](mailto:cuiql@qibebt.ac.cn).*

<sup>b</sup> *The Institute of Physics, Chinese Academy of Sciences, Beijing, 100190 P. R. China., [l.gu@iphy.ac.cn](mailto:l.gu@iphy.ac.cn)*

<sup>‡</sup> *These authors contributed equally to this work.*

Fig. S1 shows the initial charge/discharge profiles for the different amounts of isopropyl titanate served as titanium source. The initial charge/discharge capacities of 0.5 mL and 2 mL isopropyl titanate served as titanium source at the initial cycle are 519/873 and 589/775 mAh g<sup>-1</sup>, corresponding to the initial coulombic efficiency of 59% and 76%, respectively. The sample with 0.5 mL titanium source shows a relatively lower reversible capacity and initial coulombic efficiency than that of 1.0 mL titanium source, which maybe ascribe to the insufficient cover of TiN on G. As for the sample with 2.0 mL titanium source, it presents nearly the same initial coulombic efficiency as 1.0 mL. But its reversible capacity of 589 mAh g<sup>-1</sup> is lower than that of 646 mAh g<sup>-1</sup> of 1.0 mL. The excess inactive TiN on G decreased the reversible capacity.

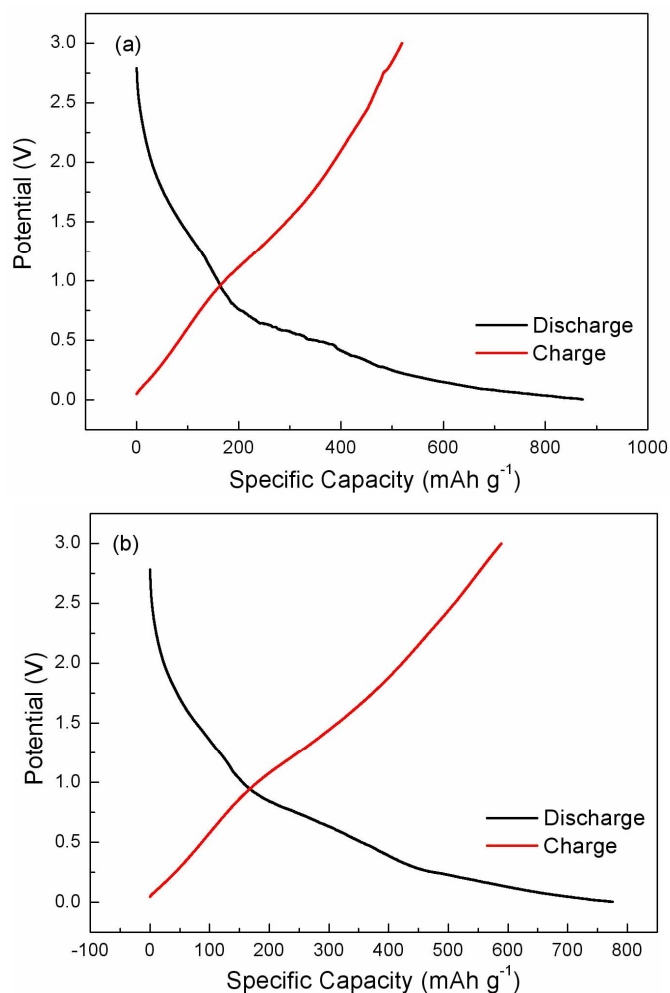

Fig. S1 Initial charge/discharge profiles for the different amounts of isopropyl titanate served as titanium source: (a) 0.5 mL; (b) 2 mL.
